# Supplementary material for: Hypericum perforatum and Its Ingredients Hypericin and Pseudohypericin Demonstrate an Antiviral Activity against SARS-CoV-2
Source: MDPI journal article supplement (doi:10.3390/ph15050530), 2022-04-25
Supplement: s1 [file s1]

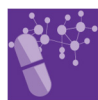

## Article

# *Hypericum perforatum* and Its Ingredients Hypericin and Pseudohypericin Demonstrate an Antiviral Activity against SARS-CoV-2

Fakry F. Mohamed <sup>1,6</sup>, Darisuren Anhlan <sup>1</sup>, Michael Schöfbänker <sup>1</sup>, André Schreiber <sup>1</sup>, Nica Classen <sup>2</sup>, Andreas Hensel <sup>2</sup>, Georg Hempel <sup>3</sup>, Wolfgang Scholz <sup>4</sup>, Joachim Kühn <sup>5</sup>, Eike R. Hrincius <sup>1,†</sup>, and Stephan Ludwig <sup>1,†,\*</sup>

- <sup>1</sup> Institute of Virology Muenster, Center for Molecular Biology of Inflammation (ZMBE), University Hospital Muenster, 48149 Muenster, Germany; framadan@uni-muenster.de (F.F.M.); anhlan@uni-muenster.de (D.A.); m\_scho79@uni-muenster.de (M.S.); andre.schreiber@uni-muenster.de (A.S.); hrincius@uni-muenster.de (E.R.H.)
- <sup>2</sup> Institute of Pharmaceutical Biology and Phytochemistry, University of Muenster, 48149 Muenster, Germany; n\_clas01@uni-muenster.de (N.C.); ahensel@uni-muenster.de (A.H.)
- <sup>3</sup> Division of Clinical Pharmacy, Institute of Pharmaceutical and Medical Chemistry, University of Muenster, 48149 Muenster, Germany; georg.hempel@uni-muenster.de
- <sup>4</sup> Hirsch Apotheke, 58507 Luedenscheid, Germany; wscholz@scholzdatabank.com
- <sup>5</sup> Division of Clinical Virology, Institute of Virology, University Hospital Muenster, 48151 Muenster, Germany; kuehnj@uni-muenster.de
- <sup>6</sup> Department of Virology, Faculty of Veterinary Medicine, Zagazig University, Zagazig 44511, Sharkia, Egypt
- \* Correspondence: ludwigs@uni-muenster.de
- † These authors contributed equally to this work.

## Supplementary materials:

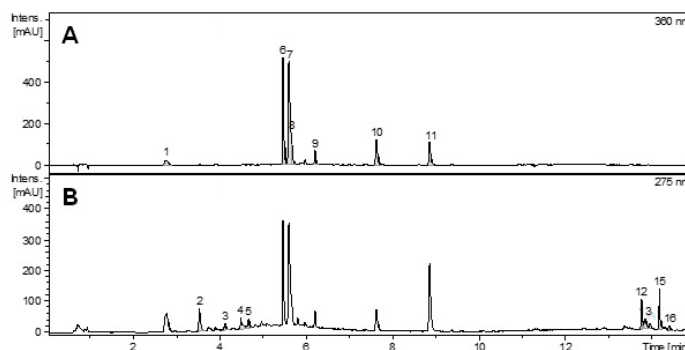

**Figure S1:** UV chromatograms of *Hypericum perforatum* (HP1) extract at  $\lambda = 360$  nm (A) and 275 nm (B). Annotated peaks were identified by the accurate masses of the protonated molecules.

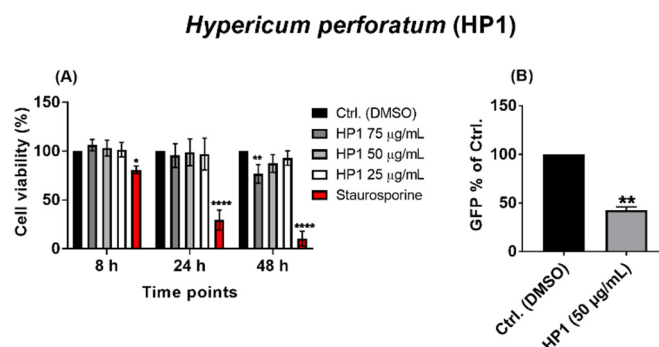

**Figure S2.** *Hypericum perforatum* (HP1) acts antiviral against the pseudo-typed VSV virus. **(A)** Vero cells were seeded overnight and at the next day incubation with *Hypericum perforatum* (HP1) or solvent control (DMSO) was initiated. Staurosporine treatment served as positive control. 8, 24 or 48 h after start of incubation, MTT assay-based cytotoxicity was measured, and cell viability as % of control is shown (mean and s.d.). Two-way ANOVA with Dunnett's Multiple comparisons was done by comparing each value with the control at each time point. **(B)** Vero cells were seeded overnight and on the next day, cells and the VSV-pseudo-typed virus were incubated with HP1 or solvent control (DMSO) for 1 h prior to infection, at 37 °C or room temperature, respectively. After pre-incubation, infection was performed with a MOI of 0.01 for 1 h and cells were finally washed and incubated without further treatments. After 16–18 h, GFP signal was visualized under fluorescent microscope. Data are shown as GFP positive cells as % of control (mean and s.d.) and students t-test with Welch's correction was applied. \* for  $p \leq 0.05$ , \*\* for  $p \leq 0.01$ , and \*\*\*\* for  $p \leq 0.0001$ .

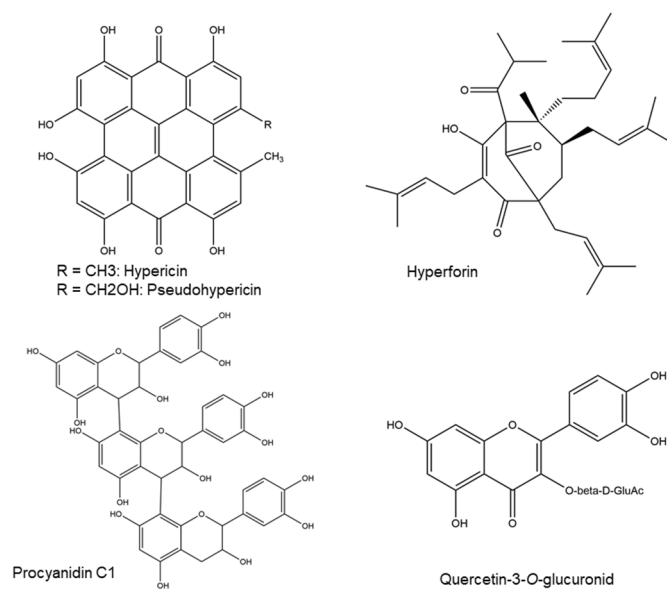

**Figure S3:** Structural features of natural products from *Hypericum perforatum* herbal material, included into functional assays.

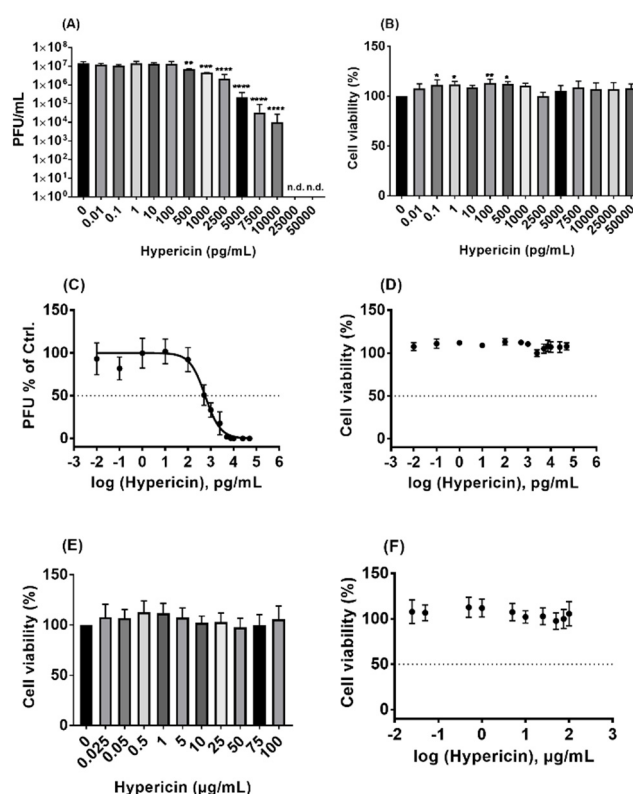

**Figure S4.** Hypericin showed a potent antiviral activity against SARS-CoV-2. **(A, C)** Vero cells were seeded overnight and on the next day, prior to infection (MOI =0.05), cells were incubated at 37 °C for 1 h with infection-DMEM containing either solvent control (DMSO) or hypericin. Concurrently, SARS-CoV-2 was incubated for 1 h at room temperature in infection-PBS that contains either DMSO or hypericin. After infection (37 °C/1 h), cells were further incubated in infection-DMEM including either DMSO or hypericin. After the 24 h infection, virus supernatants were collected and subjected to plaque assay. **(A)** Results are expressed as PFU/mL (mean and s.d.), and One-way ANOVA with Dunnett's multiple comparisons was done by comparing each value with the control. **(C)** Dose-response curve of the normalized virus titer values in % of control is depicted (mean and s.d.). **(B, D-F)** Vero cells were seeded overnight and on the next day, cells were incubated for 24 h with infection-DMEM that contains either solvent control (DMSO) or hypericin. After incubation, the MTT assay-based cytotoxicity was measured. **(B, E)** Cell viability as % of control is shown (mean and s.d.) and one-way ANOVA with Dunnett's multiple comparisons was done by comparing each value with the control. **(D, F)** Dose-response curve of the normalized cytotoxicity values in % of control is depicted (mean and s.d.). n.d. means non-detected. \* for  $p \leq 0.05$ , \*\* for  $p \leq 0.01$ , \*\*\* for  $p \leq 0.001$ , and \*\*\*\* for  $p \leq 0.0001$ .

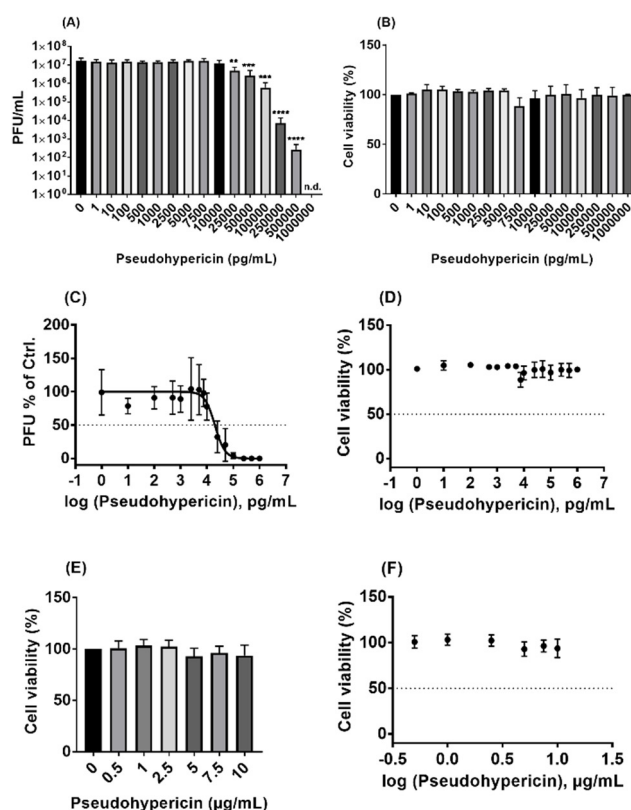

**Figure S5.** Pseudohypericin possesses an antiviral activity against SARS-CoV-2. **(A, C)** Vero cells were seeded overnight and on the next day, prior to infection (MOI = 0.05) cells were incubated at 37 °C for 1 h with infection-DMEM containing either solvent control (DMSO) or pseudohypericin. Concurrently, SARS-CoV-2 was incubated at room temperature for 1 h in infection-PBS that contains either DMSO or pseudohypericin. After infection at 37 °C for 1 h, cells were further incubated in infection-DMEM including either solvent control or pseudohypericin. 24 h after infection, virus supernatants were collected and subjected to plaque assay. **(A)** The obtained results are expressed as PFU/mL (mean and s.d.), and One-way ANOVA with Dunnett's multiple comparisons was done by comparing each value with the control. **(C)** Dose-response curve of the normalized virus titer values as % of control is depicted (mean and s.d.). **(B, D-F)** Vero cells were seeded overnight and on the next day, cells were incubated for 24 h with infection-DMEM that contains either solvent control (DMSO) or pseudohypericin. After incubation, the MTT assay-based cytotoxicity was measured. **(B, E)** Cell viability as % of control is shown (mean and s.d.), and one-way ANOVA with Dunnett's multiple comparisons was done by comparing each value with the control. **(D, F)** Dose-response curve of the normalized cytotoxicity values as % of control is depicted (mean and s.d.). n.d. means non-detected. \*\* for  $p \leq 0.01$ , \*\*\* for  $p \leq 0.001$ , and \*\*\*\* for  $p \leq 0.0001$ .

### *Hypericum perforatum* (HP1) and Hypericin (HY)

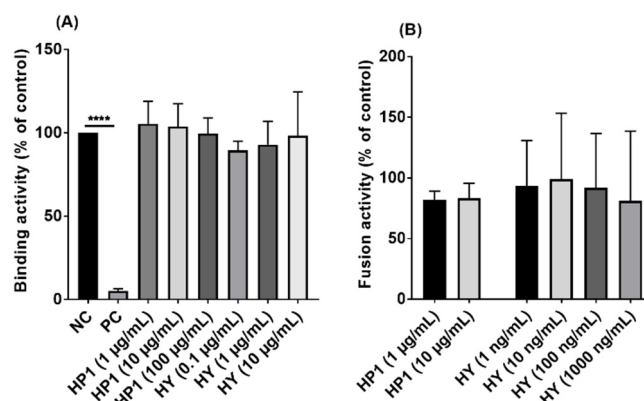

**Figure S6.** *Hypericum perforatum* (HP1) and its ingredient hypericin (HY) do not affect SARS-CoV-2 S protein-mediated ACE2 binding and fusion activity. **(A)** An hACE2 SARS-CoV-2 S protein RBD sVNT was conducted to test the ability of different concentrations of HP1 or hypericin to inhibit the specific binding of the SARS-CoV-2 S protein receptor binding domain (RBD) to hACE2. Data are represented as % of negative control (mean and s.d.). One-way ANOVA with Dunnett's multiple comparisons was done by comparing each value with the negative control. **(B)** A virus free cell-cell fusion assay was conducted to examine the fusion activity of the SARS-CoV-2 S protein upon treatment with different concentrations of HP1 or hypericin. In brief, to be fused, cells were transfected with SARS-CoV-2 expressing plasmid and treated with the indicated concentrations of HP1 and hypericin. Results are represented as SEAP reporter enzyme levels, which are correlated with the fusion activity (% of control) (mean and s.d.). \*\*\*\* for  $p \leq 0.0001$ .

Supplementary Table S1. Data of peaks identified by LC +ESI-qTOF-MS.

| Peak No. | t <sub>R</sub> /min | Identity                    | m/z [M+H] <sup>+</sup> | Ion formula                                                     | err/mDa | mSigma |
|----------|---------------------|-----------------------------|------------------------|-----------------------------------------------------------------|---------|--------|
| 1        | 2.8                 | Monocaffeoyl quinic acid    | 355.1029               | [C <sub>16</sub> H <sub>19</sub> O <sub>9</sub> ] <sup>+</sup>  | 0.5     | 25.1   |
| 2        | 3.5                 | Monocumaroyl quinic acid    | 339.1097               | [C <sub>16</sub> H <sub>19</sub> O <sub>8</sub> ] <sup>+</sup>  | 2.3     | 7.8    |
| 3        | 4.1                 | Dimeric B-type procyanidin  | 579.1551               | [C <sub>30</sub> H <sub>27</sub> O <sub>12</sub> ] <sup>+</sup> | -5.4    | 11.7   |
| 4        | 4.5                 | (Epi)catechin               | 291.0899               | [C <sub>15</sub> H <sub>15</sub> O <sub>6</sub> ] <sup>+</sup>  | 3.6     | 7.4    |
| 5        | 4.7                 | Procyanidin C1              | 867.2232               | [C <sub>45</sub> H <sub>39</sub> O <sub>18</sub> ] <sup>+</sup> | -10.1   | 48.7   |
| 6        | 5.5                 | Rutin                       | 611.1651               | [C <sub>27</sub> H <sub>31</sub> O <sub>16</sub> ] <sup>+</sup> | 4.5     | 1.5    |
| 7        | 5.6                 | Hyperoside                  | 465.1061               | [C <sub>21</sub> H <sub>21</sub> O <sub>12</sub> ] <sup>+</sup> | 3.3     | 3.8    |
| 8        | 5.6                 | Isoquercitroside            | 465.1052               | [C <sub>21</sub> H <sub>21</sub> O <sub>12</sub> ] <sup>+</sup> | 2.4     | 16.9   |
|          |                     | Quercetin-3-O-glucuronide   | 479.0864               | [C <sub>21</sub> H <sub>19</sub> O <sub>13</sub> ] <sup>+</sup> | 4.4     | 11.9   |
| 9        | 6.2                 | Quercitrin                  | 449.1099               | [C <sub>21</sub> H <sub>21</sub> O <sub>11</sub> ] <sup>+</sup> | 2.1     | 29.4   |
| 10       | 7.6                 | Quercetin                   | 303.0514               | [C <sub>15</sub> H <sub>11</sub> O <sub>7</sub> ] <sup>+</sup>  | 1.5     | 13.5   |
| 11       | 8.9                 | Biapigenin                  | 539.1032               | [C <sub>30</sub> H <sub>19</sub> O <sub>10</sub> ] <sup>+</sup> | 5.9     | 8.3    |
| 12       | 13.8                | Unidentified Phloroglucinol | 553.3938               | [C <sub>35</sub> H <sub>53</sub> O <sub>5</sub> ] <sup>+</sup>  | -5.1    | 38.3   |
| 13       | 13.9                | Unidentified Phloroglucinol | 553.3936               | [C <sub>35</sub> H <sub>53</sub> O <sub>5</sub> ] <sup>+</sup>  | 4.8     | 20.2   |
| 14       | 14.0                | Unidentified Phloroglucinol | 567.4068               | [C <sub>36</sub> H <sub>55</sub> O <sub>5</sub> ] <sup>+</sup>  | -2.4    | 32.3   |
| 15       | 14.2                | Hyperforin                  | 537.3979               | [C <sub>35</sub> H <sub>53</sub> O <sub>4</sub> ] <sup>+</sup>  | 4.0     | 14.0   |
| 16       | 14.4                | Adhyperforin                | 551.4128               | [C <sub>36</sub> H <sub>55</sub> O <sub>4</sub> ] <sup>+</sup>  | 3.3     | 9.9    |

**Supplementary Table S2.** Dose-response curve analysis of *Hypericum perforatum*, hypericin, and pseudohypericin against the pseudo-typed VSV virus carrying the SARS- CoV-2 S protein or the SARS-CoV-2 full virus

| Substance                         | IC <sub>50</sub> * | CC <sub>50</sub> * | Selectivity index<br>(SI=CC <sub>50</sub> / IC <sub>50</sub> ) |
|-----------------------------------|--------------------|--------------------|----------------------------------------------------------------|
| <b>Pseudo-typed virus system:</b> |                    |                    |                                                                |
| <i>Hypericum perforatum</i>       | 36.88 µg/mL        | >100 µg/mL         | >2.71                                                          |
| Hypericin                         | 48.57 ng/mL        | >1000 ng/mL        | >20.59                                                         |
| Pseudohypericin                   | 298.4 ng/mL        | >2000 ng/mL        | >6.7                                                           |
| <b>SARS-CoV-2 virus system:</b>   |                    |                    |                                                                |
| <i>Hypericum perforatum</i>       | 1.353 µg/mL        | >100 µg/mL **      | >73.91                                                         |
| Hypericin                         | 559.1 pg/mL        | >100 µg/mL **      | >178858.88                                                     |
| Pseudohypericin                   | 20036 pg/mL        | >10 µg/mL **       | >499.1                                                         |

\* Normalized values have been used for calculations

\*\* Escalated CC<sub>50</sub> (highest possible concentration tested for toxicity)
